# Supplementary material
Source: Springer Nature journal article supplement (https://www.springermedizin.de/resource/supplementary/12937_2009_278_MOESM3_ESM.pdf/25654770)

C  
i  
r  
c  
u  
m  
f  
e  
r  
e  
n  
c  
e  
  
H  
e  
a  
d

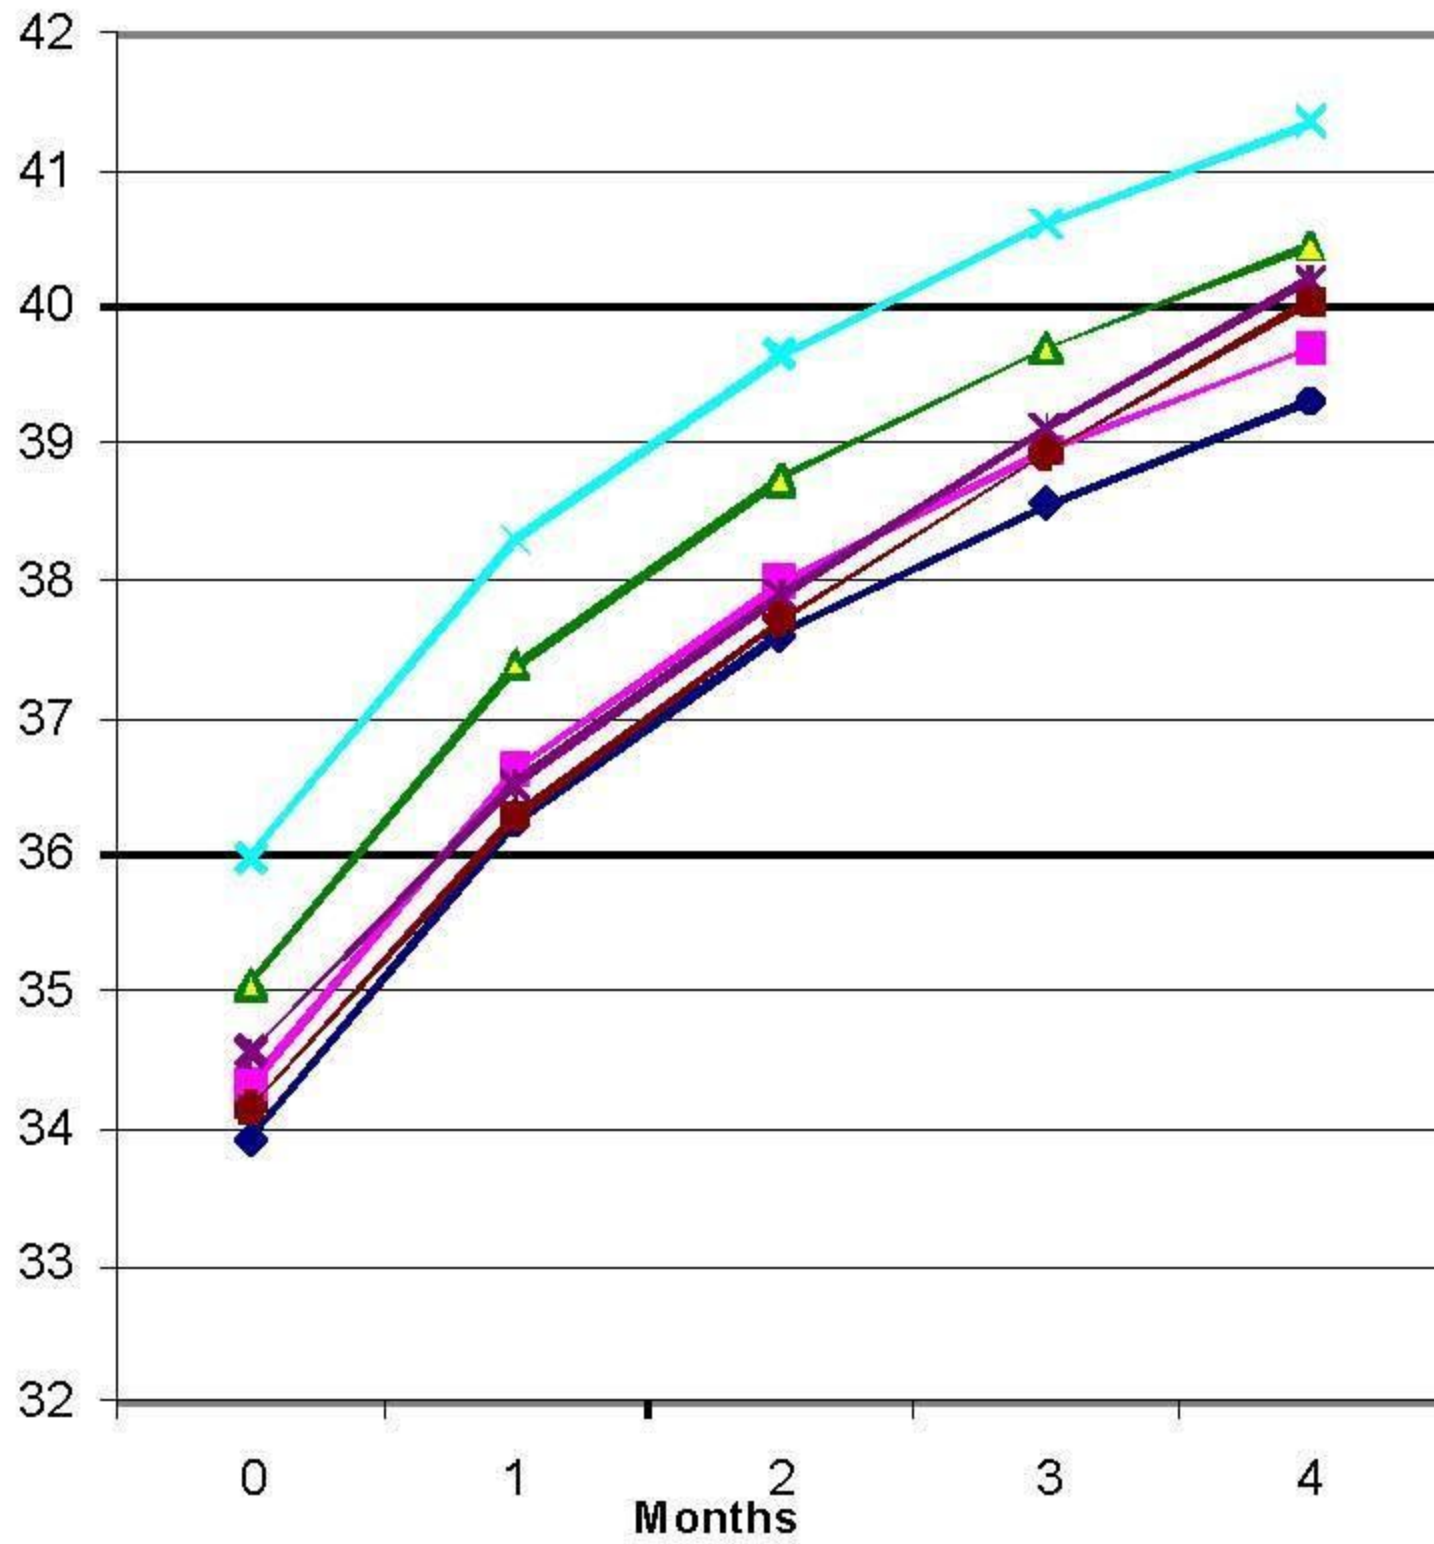

- P5
- P10
- P25
- P50
- Gold with Lutein
- Gold

Supplement: MOESM3 [file 25654770]
